# Supplementary material for: Dual Oncogenic/Anti-Oncogenic Role of PATZ1 in FRTL5 Rat Thyroid Cells Transformed by the Ha-RasV12 Oncogene
Source: MDPI journal article supplement (doi:10.3390/genes10020127), 2019-02-09
Supplement: s1 [file s1]

**a**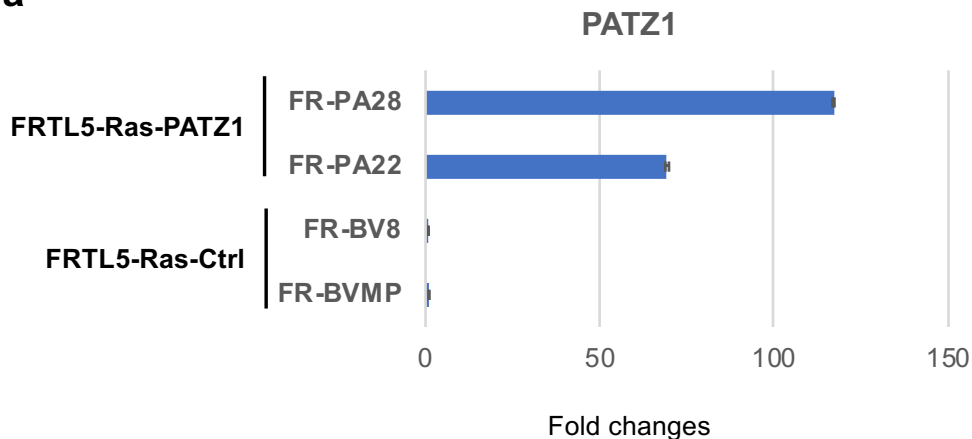**b**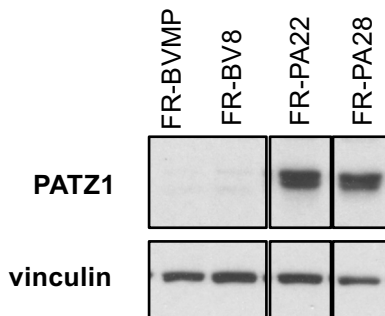

**Figure S1.** PATZ1 expression in FRTL5-Ras-PATZ1 cells. (a) qRT-PCR and (b) western blot analysis of PATZ1 expression in FRTL5-Ras-Ctrl and FRTL5-Ras PATZ1 clones used in this study [19]. *G6pd* and Vinculin have been analyzed as sample loading controls in a and b, respectively. Black lines delineate the boundary between not contiguous lanes of the same gel.
