# Supplementary material for: Dual Oncogenic/Anti-Oncogenic Role of PATZ1 in FRTL5 Rat Thyroid Cells Transformed by the Ha-RasV12 Oncogene
Source: MDPI journal article supplement (doi:10.3390/genes10020127), 2019-02-09
Supplement: s1 [file s1]

**a**

### Stem cell-specific gene expression (experiment 2)

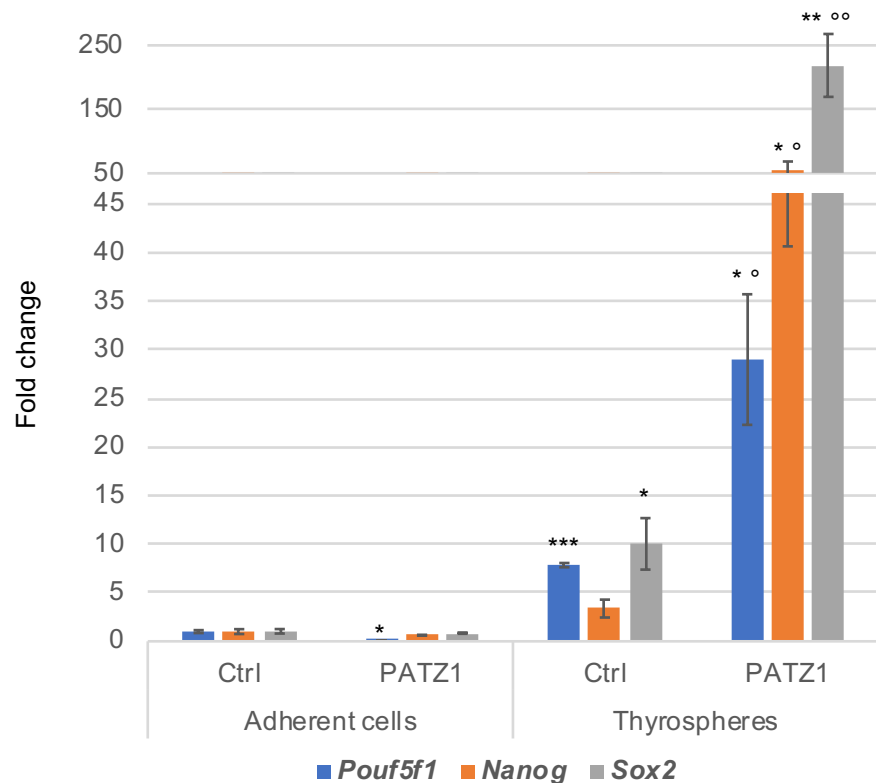**b**

### Stem cell-specific gene expression (experiment 3)

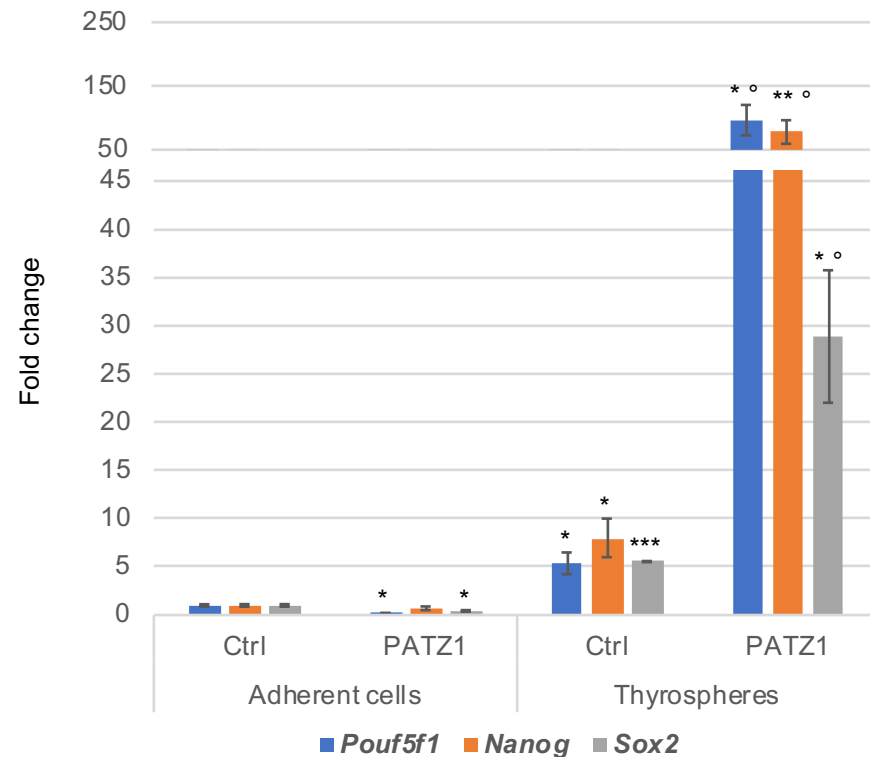

**Figure S3.** Stem-cell markers expression in adherent and spheroid FRTL5-Ras-PATZ1 cells. Two out of three independent experiments of qRT-PCR to analyze *Pou5f1*, *Nanog* and *Sox2* gene expression in P1 thyrospheres and corresponding bulk cells grown in adhesion. Each panel shows mean values +/- SE of one experiment performed in duplicate. \*, P < 0.05; \*\*, P < 0.01 versus related adherent cell controls; °, P < 0.05; °°, P < 0.01 versus control thyrospheres, as assessed by multiple t-tests. See also Figure 3c for another replica experiment.
